# Supplementary material
Source: PubMed Central journal article supplement (PMC4790830)
Supplement: rubf008031.ww1_default.pdf [file rubf008031.ww1_default.pdf]

EVA Study Research Group (“Embarazo y Vacuna Antigripal”)

**Members of EVA Research Group**

**Field Coordinators:** Cecilia Buttner, Marta Ferrary, Francisco Saraceno, María Celina Ocampo, Yanina Martino, Perla Martino, Patricia Saidón, Christian Muzio, Daniela González, María Farinato, Patricia Farinella,.

**Ministry of Health:** Máximo Diosque, Secretario de Promoción y Programas Sanitarios del Ministerio de Salud, Carla Vizzotti, responsable del Programa Nacional de Control de Enfermedades Inmunoprevenibles del Ministerio de Salud.

**Hospital Coordinators**

**Hospital Alvarez:** Analía Messina

**Hospital Rivadavia:** María Elena Seidelstein

**Hospital Santojanni:** Lorena Inés Claus, Miguel Angel Huespe, Silvina Mazzeo

**Hospital Durand:** Carmen Terrones, Jorge González

**Maternidad Sardá:** Cristina Laterra, Sandra Susacasa

**Hospital Vélez Sarsfield:** Ricardo Spagnuolo

**Hospital Enrique Eril:** Hilda Elordi

**Hospital Mariano y Luciano de la Vega:** Salvador Natale, Liliana Accarezzatto

**Hospital Héros de Malvinas:** Marcelo Damiano

**Hospital Virgen del Carmen:** Silvina Zambrini

**Hospital Madre Teresa de Calcuta:** Beatriz Peker

**Hospital Carlos Bocalandro:** María Cristina Frers Campos

**Hospital San Roque de Gonnet:** María Teresa Moreno, María Huarte

**Hospital Dra. Teresa Germani:** Carmelo Mastrogiovanni

**Hospital Lavignole:** Christian Muzio

**Hospital Carlos Gianantonio:** Daniel Fernández

**Maternidad Santa Rosa:** Huayca Pugliese

**Hospital Comunal de Tigre:** Osvaldo Tiberio, Jorge Zapata

**Hospital Paraná de Entre Ríos:** Graciela López Degani, Lorenzo Torrealdy

**Hospital Isidoro Iriarte:** Sergio Posanzini

**Hospital Arturo Oñativia:** Angel Betular, Adriana Grahl

**Hospital Meisner:** Cristina Trubbo, Ivana Scheller

**Hospital Cosme Argerich:** Alicia Acosta, Raúl Rivadero

**Hospital Penna:** Mónica Colusi, Gustavo Fernández, Enrique Aguilera

**Hospital Lagomaggiore de Mendoza:** Susana Lucero

**Hospital de Rosario:** Alicia del Pino, Stella Maris Bravo

**Hospital Simplemente Evita:** Miriam Schenfeld

**Hospital de Mar del Plata:** María Eugenia Ugarte

**Hospital Cecilia Grierson:** Alejandra Domingo

**Hospital Ana Goitía:** Estela Acosta

**Hospital Vicente López y Planes de General Rodríguez:** María Irbarzabal

**Hospital Penna de Bahía Blanca:** Elda Pérez

**Hospital Fiorito:** Julio Firpo

**Hospital Thompson:** Margarita Vilar

**Hospital Presidente Perón:** Natalia Aranda

**Hospital Eduardo Oller:** María Bustamante
